# Supplementary material for: Efficiency and Safety of CyberKnife Robotic Radiosurgery in the Multimodal Management of Patients with Acromegaly
Source: MDPI journal article supplement (doi:10.3390/cancers15051438), 2023-02-24
Supplement: s1 [file s1]

# Supplementary Materials

Table S1.- Radiosurgery treatment characteristics.

| Variable                    | Mean    | Median  | IQR             | SD      |
|-----------------------------|---------|---------|-----------------|---------|
| Prescribed dose, cGy        | 2302.94 | 2300    | 2200-2500       | 266.83  |
| Maximum dose, cGy           | 3002.09 | 2942.18 | 2682.92-3333.33 | 480.96  |
| Coverage %, %               | 96.88   | 96.41   | 95.77-98.25     | 1.39    |
| Isodose curve, %            | 77.5    | 77      | 72-84           | 7.52    |
| GTV, cc                     | 1.28    | 0.83    | 0.47-1.52       | 1.19    |
| Chiasm dose, cGy            | 966.45  | 939.48  | 873.26-1059.78  | 275.37  |
| Right optic nerve dose, cGy | 636.62  | 620.46  | 346.16-908.35   | 319.67  |
| Left optic nerve dose, cGy  | 706.8   | 735.14  | 497.1-944.79    | 292.53  |
| Brain dose, cGy             | 1913.15 | 1555.16 | 912.17-3048.17  | 1158.93 |

Abbreviations: cGy, centigray; SD, standard deviation; IQR, interquartile range.

Table S2.- Comparison of radiosurgery treatment characteristics between the with and without hormone deficiency groups at the end of follow-up (n=37).

| Variable, median (IQR)         | With hormone deficiency*<br>(n=12) | Without hormone<br>deficiency* (n=25) | P <sup>a</sup> |
|--------------------------------|------------------------------------|---------------------------------------|----------------|
| Prescribed dose, cGy           | 2300 (2250-2450)                   | 2300 (2300-2500)                      | 0.49           |
| Maximum dose, cGy              | 2857 (2711-3112)                   | 2973 (2817-3472)                      | 0.26           |
| Coverage %, %                  | 97.5 (96.3-98.7)                   | 96 (95.7-98)                          | 0.05           |
| Isodose curve, %               | 80 (76-85)                         | 77 (72-83)                            | 0.13           |
| GTV, cc                        | 0.9 (0.71-1.4)                     | 0.8 (0.45-1.49)                       | 0.41           |
| Chiasm dose, cGy               | 912 (863-983)                      | 950 (876-1060)                        | 0.2            |
| Right optic nerve dose,<br>cGy | 790 (366-982)                      | 618 (450-840)                         | 0.32           |
| Left optic nerve dose,<br>cGy  | 635 (474-800)                      | 737 (676-965)                         | 0.19           |
| Brain dose, cGy                | 1512 (1325-2333)                   | 1555 (912-2597)                       | 0.76           |

Abbreviations: cGy, centigray; SD, standard deviation; IQR, interquartile range. <sup>a</sup>P value estimated with Mann-Whitney U test. \*Hormone deficiency was defined as the presence of at least one new hormonal deficiency of the hypothalamic-pituitary axis.
